# Supplementary material
Source: PubMed Central journal article supplement (PMC8011958)
Supplement: NIHMS1635966-supplement-1.pdf [file NIHMS1635966-supplement-1.pdf]

**Figure S1.**

| TNM staging | Tumor type (N = 142) |              |              |
|-------------|----------------------|--------------|--------------|
|             | NET (N = 4)          | AC (N = 123) | GCC (N = 15) |
| Stage I     | 1                    | 0            | 1            |
| Stage II    | 0                    | 8            | 0            |
| Stage III   | 0                    | 9            | 2            |
| Stage IV    | 3                    | 106          | 12           |

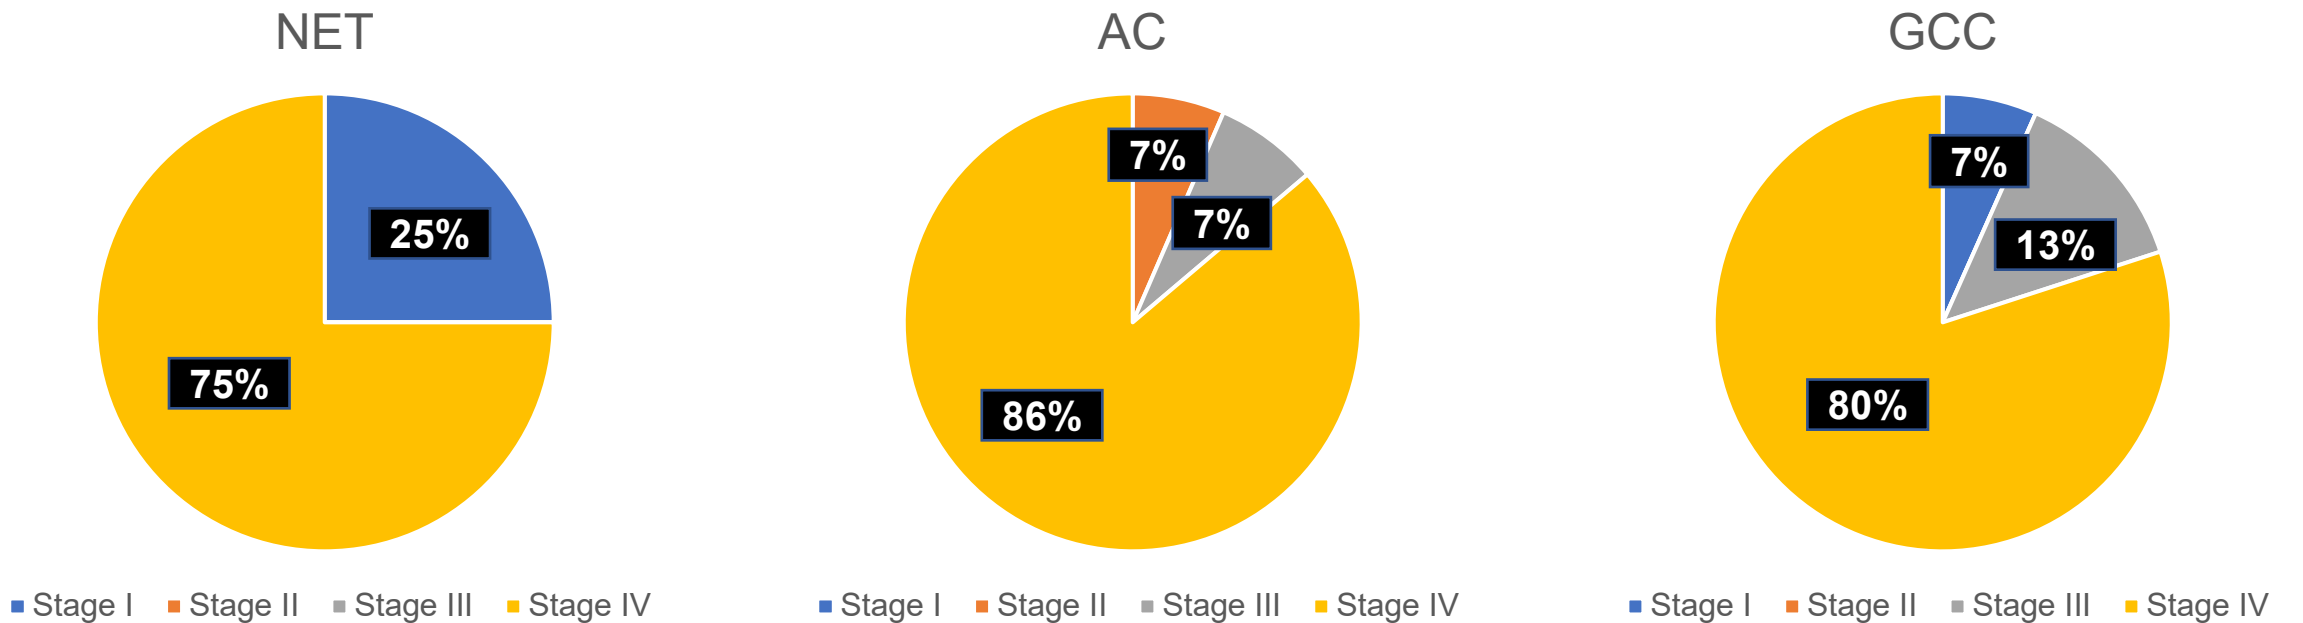

TNM staging summary.

Abbreviations: AC, adenocarcinoma; GCC, goblet cell carcinoid; NET, neuroendocrine tumor.
