# Supplementary material
Source: PubMed Central journal article supplement (PMC8011958)
Supplement: NIHMS1635966-supplement-2.pdf [file NIHMS1635966-supplement-2.pdf]

**Figure S2.**

**A**

| Gene           | Function                           | N         |
|----------------|------------------------------------|-----------|
| <i>APC</i>     | WNT signaling                      | 1         |
| <i>ARID1A</i>  | Epigenetic (Chromatin remodeling)  | 2         |
| <i>ATM</i>     | DDR                                | 1         |
| <i>BCOR</i>    | Others (Transcriptional repressor) | 1         |
| <i>BRAF</i>    | MAPK                               | 2         |
| <i>CDC73</i>   | Epigenetic (Histone methylation)   | 1         |
| <i>CDH1</i>    | Cell adhesion                      | 2         |
| <i>CHEK2</i>   | DDR                                | 2         |
| <i>CIC</i>     | Others (Transcriptional repressor) | 1         |
| <i>ERBB2</i>   | RTK                                | 1         |
| <i>ERCC2</i>   | DDR                                | 1         |
| <i>FBXW7</i>   | Others (Ubiquitination)            | 2         |
| <i>FGFR2</i>   | RTK                                | 1         |
| <i>GNAS</i>    | G protein                          | 2         |
| <i>KDM6A</i>   | Epigenetic (Histone demethylation) | 1         |
| <i>KMT2D</i>   | Epigenetic (Histone methylation)   | 1         |
| <i>KRAS</i>    | MAPK                               | 4         |
| <i>NF1</i>     | MAPK                               | 1         |
| <i>PIK3CA</i>  | PI3K signaling                     | 1         |
| <i>RNF43</i>   | WNT signaling                      | 1         |
| <i>SMAD2</i>   | TGF- $\beta$ signaling             | 1         |
| <i>SMAD4</i>   | TGF- $\beta$ signaling             | 5         |
| <i>SMARCA4</i> | Epigenetic (Chromatin remodeling)  | 1         |
| <i>STK11</i>   | AMPK                               | 1         |
| <i>TP53</i>    | Cell cycle                         | 13        |
| <b>Total</b>   |                                    | <b>50</b> |

**B**

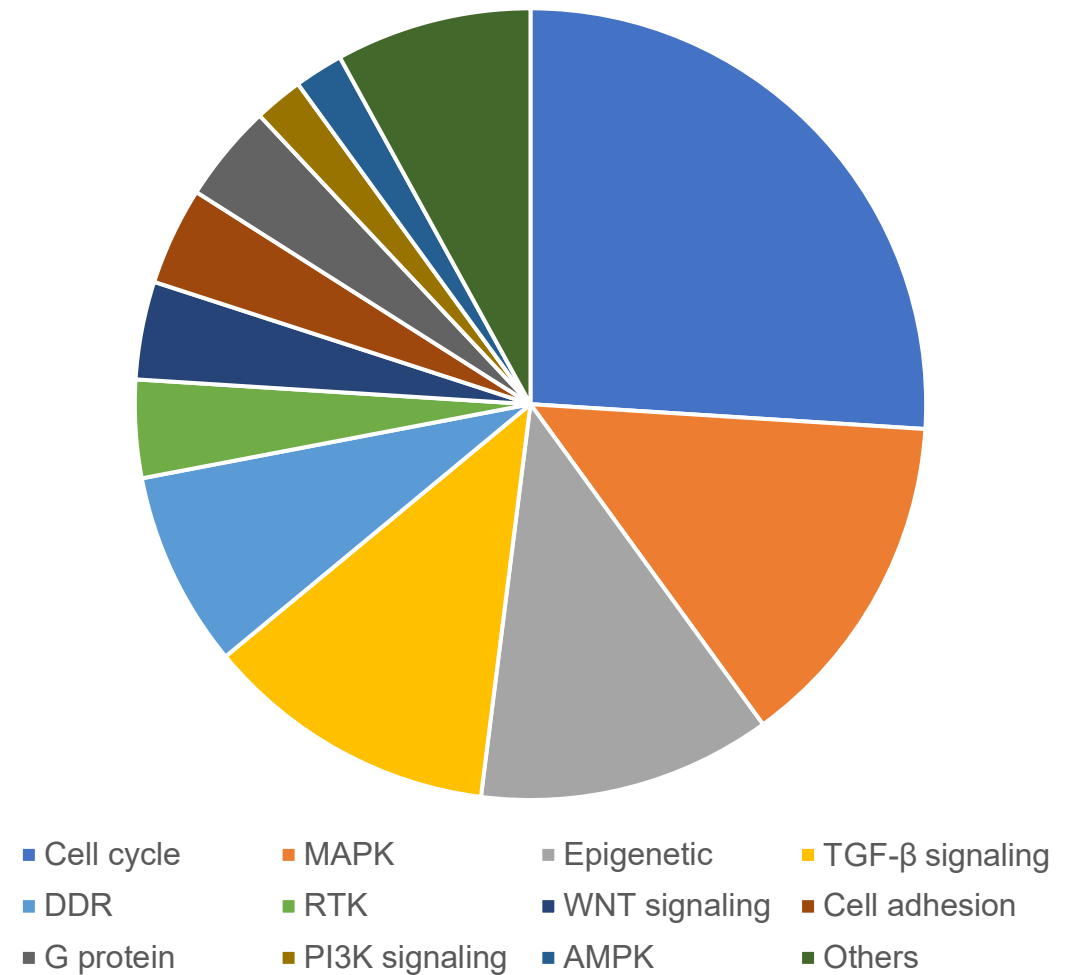

Detected gene mutations and pathway-specific mutations in GCC.

A, Gene mutations detected in GCC and the major function of the genes.

B, Pathway-specific mutations observed in GCC.

Abbreviations: DDR, DNA damage response; GCC, goblet cell carcinoid; RTK, receptor tyrosine kinase.
