# Supplementary material
Source: PubMed Central journal article supplement (PMC8011958)
Supplement: NIHMS1635966-supplement-3.pdf [file NIHMS1635966-supplement-3.pdf]

**Figure S3.**

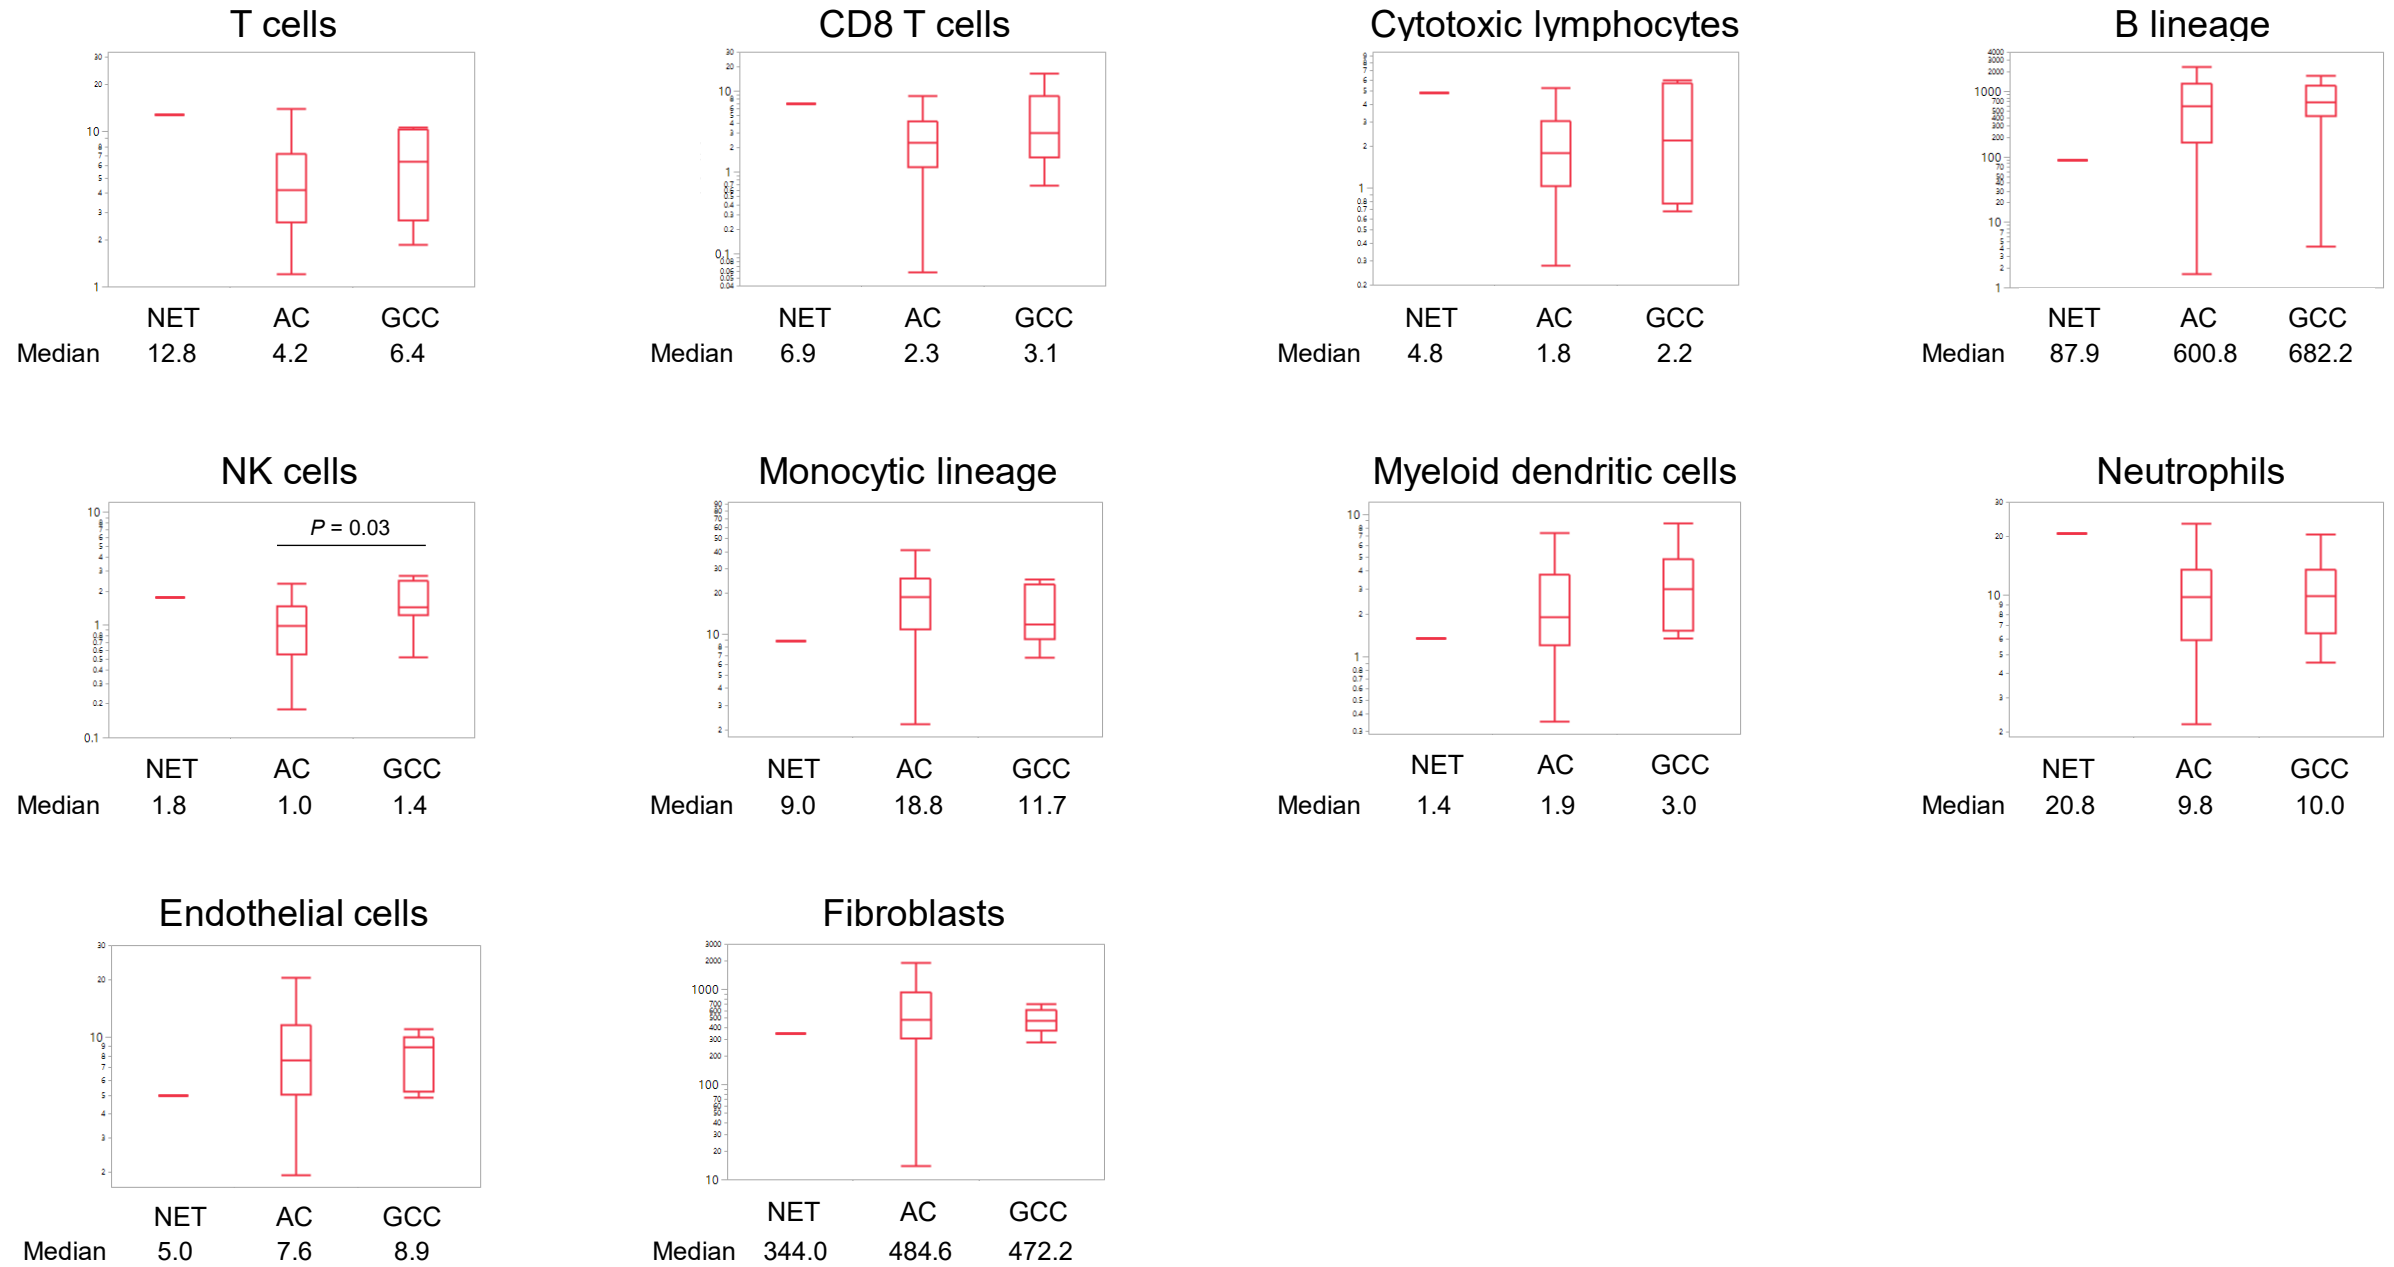

MCP-counter results for the three appendiceal tumor groups.

Abbreviations: AC, adenocarcinoma; GCC, goblet cell carcinoid; NET, neuroendocrine tumor.
